# Supplementary material for: Yes-Associated Protein (Yap) Is Up-Regulated in Heart Failure and Promotes Cardiac Fibroblast Proliferation
Source: MDPI journal article supplement (doi:10.3390/ijms22116164), 2021-06-07
Supplement: s1 [file s1]

Supplemental Figures

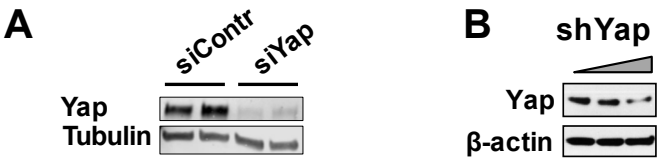

**Supplemental Figure S1.** Efficient Yap downregulation. (A) Human adult cardiac fibroblasts were transfected with control (siContr) and Yap (siYap) siRNA, followed by immunoblot analysis to Yap protein level;  $n = 5$ . (B) Human adult cardiac fibroblasts were transduced with different doses of adenovirus expressing shRNA Yap (shYap) followed by immunoblot analysis to detect Yap;  $n = 2$ .

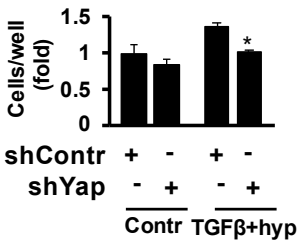

**Supplemental Figure S2.** Yap contributes to human adult cardiac fibroblast growth. Cardiac fibroblasts infected with adenovirus expressing shRNA Yap (shYap) or control adenovirus (shContr) and exposed to hypoxia (1% O<sub>2</sub>) and TGFβ (10 ng/mL) followed by cell count performed at day 5 of exposure. Data are mean  $\pm$  S.E.M; \* and #  $p < 0.05$  vs. shContr and shContr+hypoxia/TGFβ, respectively,  $n = 3-4$ /condition.

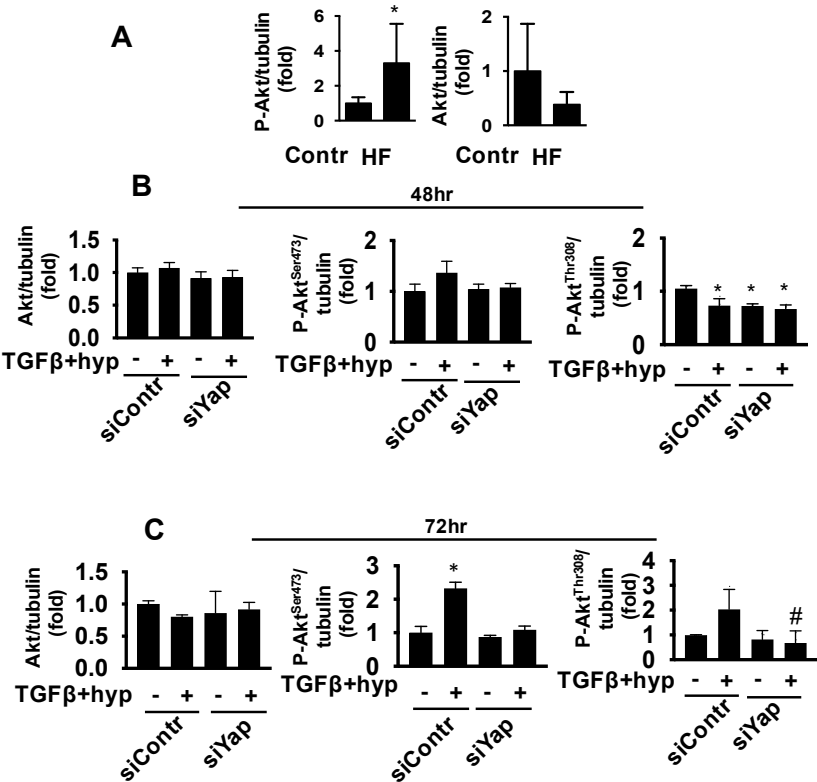

**Supplemental Figure S3.** Yap-dependent activation of Akt in HF and profibrotic conditions. (A) Detailed densitometry analysis of LV tissues from HF patients and control individuals from Figure 4A showing quantification of Akt and P-Akt normalized to

housekeeping control. Data represent mean  $\pm$  S.E.M of fold changes from control;  $n = 7$  subjects/group,  $*p < 0.05$  vs. control (B,C) Graphs representing fold change quantitative densitometry analysis normalized to corresponding loading control for total and phospho-Akt from Figures 4C–F of human cardiac fibroblasts transfected with siContr or siYap exposed to normoxia and vehicle (-) or hypoxia (1% O<sub>2</sub>) and TGF $\beta$  (10 ng/mL) for stated durations. Data represent mean  $\pm$  S.E.M. of fold changes from siContr control (-);  $*p < 0.05$  vs. siContr control (-),  $\#p < 0.05$  vs. siContr control exposed to hypoxia (1% O<sub>2</sub>) and TGF $\beta$  (10 ng/mL);  $n = 3$ –4/condition.

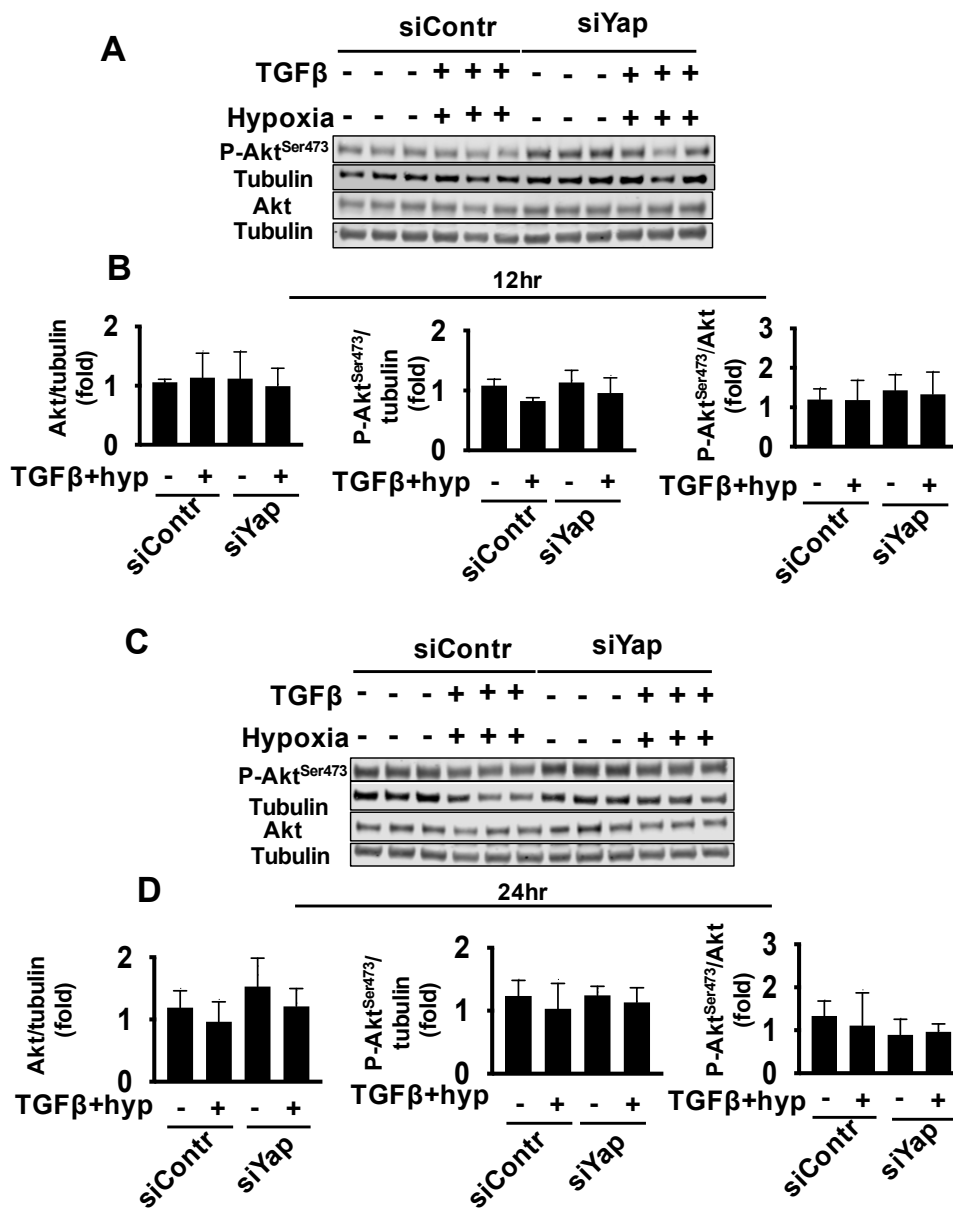

**Supplemental Figure S4.** Akt is not activated at early profibrotic stress timepoints. (A,C) Representative immunoblot for indicated proteins of human adult cardiac fibroblasts transfected with siYap or siContr and exposed to hypoxia/TGF $\beta$ . (B,D) Fold change immunoblot densitometry analyses of indicated proteins normalized to corresponding loading control. Data represent mean  $\pm$  S.E.M of fold changes to siContr-infected vehicle-treated control group (-);  $n = 3$ /condition.

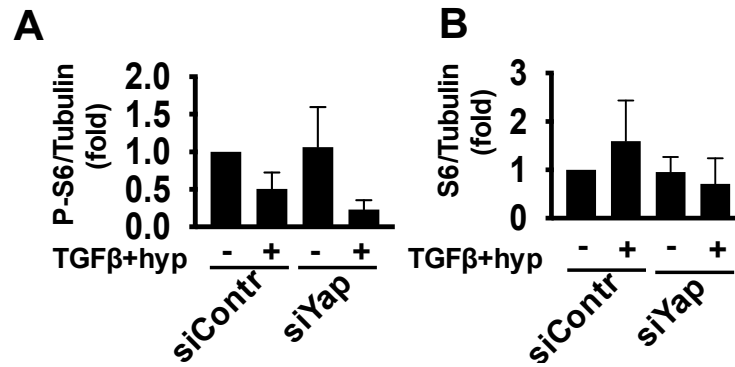

**Supplemental Figure S5.** Alleviation of mTOR signaling with profibrotic conditions does not alter with Yap silencing. (A,B) Fold change immunoblot densitometry analyses from Figure 5A of S6 and phospho-S6 (p-S6) normalized to corresponding loading control in human adult cardiac fibroblasts transfected with siYap or siContr and exposed to hypoxia/TGFβ. Data represent mean ± S.E.M of fold changes to siContr-infected vehicle-treated control group (-); *n* = 3–4/condition.

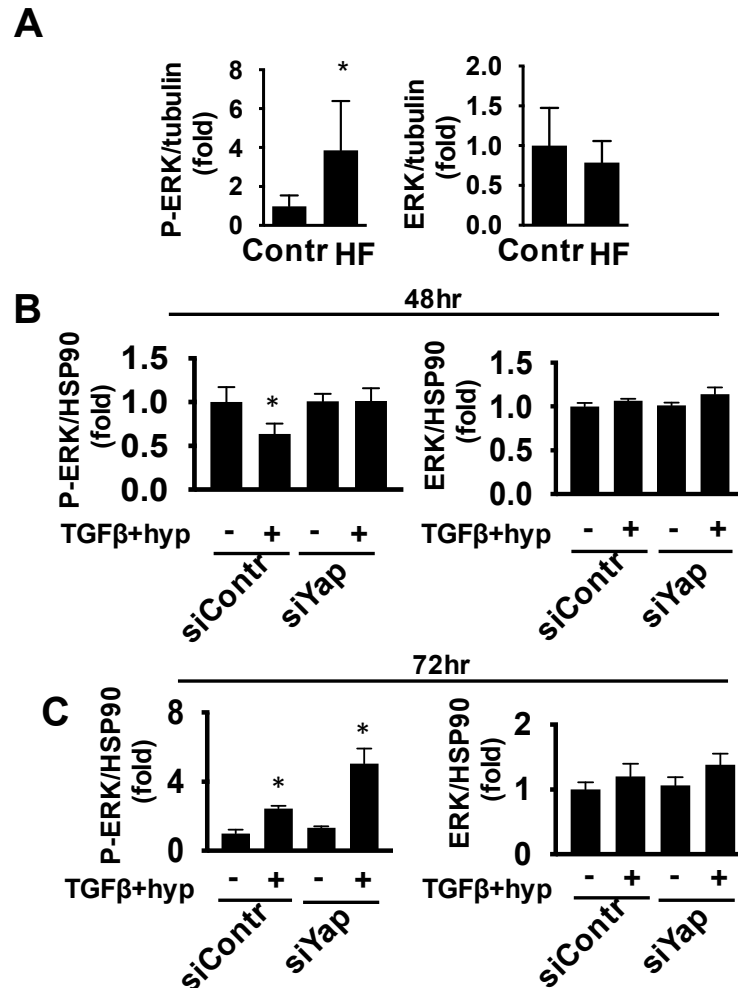

**Supplemental Figure S6.** Yap-independent elevation of ERK1/2 signaling under conditions of HF. (A–C) Quantitative densitometry analyses of indicated proteins in (A) LV tissues from HF patients and control individuals from Figure 6 A. Data represent mean ± S.E.M of fold changes from control; *n* = 7 subjects/group, \**p* < 0.05 vs. control. (B,C) Human adult cardiac fibroblasts transfected with siYap or siContr and exposed to hypoxia/TGFβ for stated durations normalized to corresponding loading control from Figures 6C,E. Data represent mean ± S.E.M of fold changes from siContr-infected vehicle-treated control group (-); *n* = 3–4/condition, \**p* < 0.05 vs. corresponding (-) control.

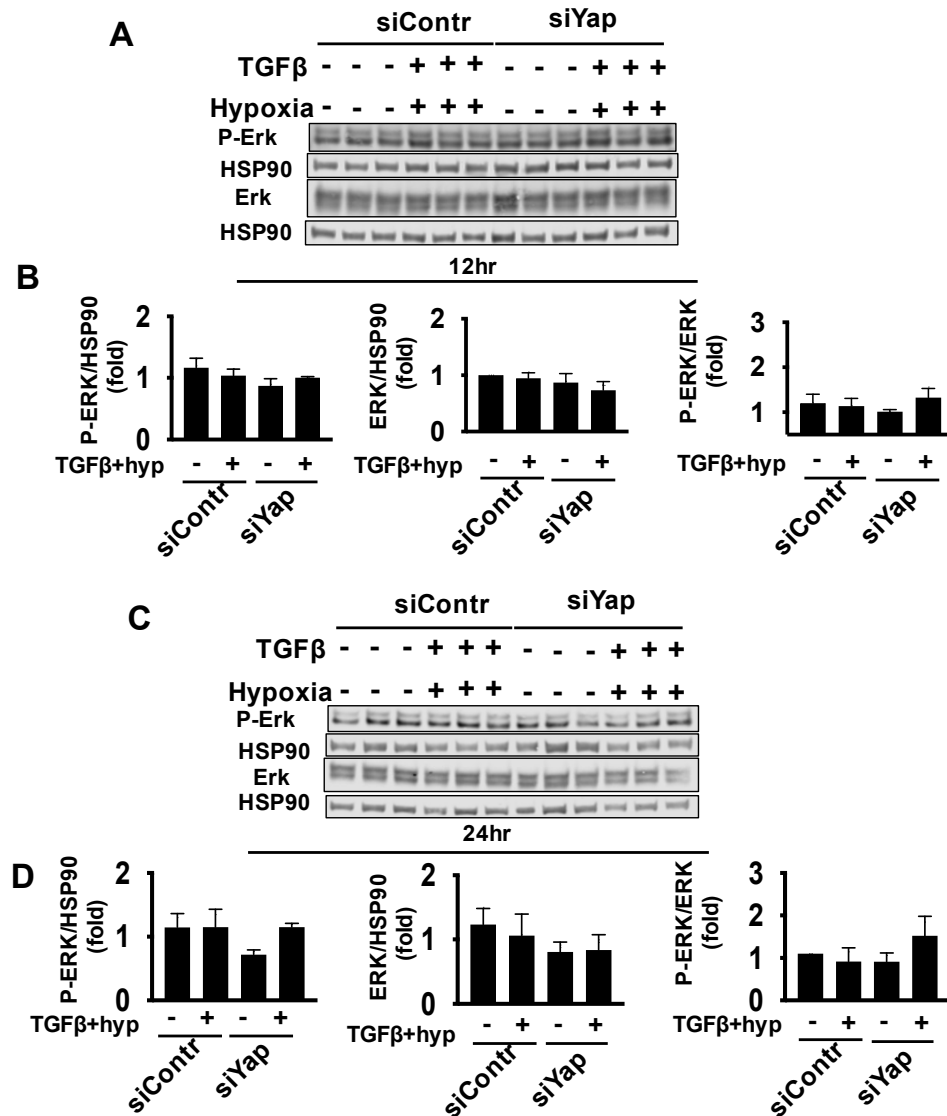

**Supplemental Figure S7.** Hypoxia/TGF $\beta$  does not activate Erk signaling at early timepoints. (A,C) Representative immunoblot for indicated proteins of human adult cardiac fibroblasts transfected with siYap or siContr and exposed to hypoxia/TGF $\beta$ . (B,D) Fold change immunoblot densitometry analyses of indicated proteins normalized to corresponding loading control. Data represent mean  $\pm$  S.E.M of fold changes to siContr-infected vehicle-treated control group (-);  $n = 3$ /condition.
